# Supplementary material for: Antifungal synergy of a topical triazole, PC945, with a systemic triazole against respiratory Aspergillus fumigatus infection
Source: PubMed Central journal article supplement (PMC6603190; doi:10.1038/s41598-019-45890-w), 2019-07-01
Supplement: 41598_2019_45890_MOESM2_ESM.pdf [file 41598_2019_45890_MOESM2_ESM.pdf]

## Supplementary tables

Title

**Antifungal synergy of a topical triazole, PC945, with a systemic triazole against respiratory *Aspergillus fumigatus* infection**

**Thomas Colley<sup>1</sup>, Gurpreet Sehra<sup>1</sup>, Leah Daly<sup>1</sup>, Genki Kimura<sup>2</sup>, Takahiro Nakaoki<sup>2</sup>, Yuki Nishimoto<sup>2</sup>, Yasuo Kizawa<sup>2</sup>, Pete Strong<sup>1</sup>, Garth Rapeport<sup>1</sup>, Kazuhiro Ito<sup>1\*</sup>**

<sup>1</sup> Pulmocide Ltd, London, SW7 2PG, UK

<sup>2</sup> Laboratory of Physiology and Anatomy, Nihon University School of Pharmacy, Funabashi, Chiba 274-8555, Japan

\* Corresponding author: Dr. Kazuhiro Ito; kaz@pulmocide.com.

### SUPPLEMENTARY TABLE S1

Susceptibility of PC945 and known antifungals to *A. fumigatus* isolates determined by standard broth microdilution (EUCAST)

| <i>A. fumigatus</i> strain    | (MIC: µg/mL) |              |              |              |                |
|-------------------------------|--------------|--------------|--------------|--------------|----------------|
|                               | PC945        | Posaconazole | Voriconazole | Itraconazole | Amphotericin B |
| NCPF2010                      | 0.063        | 0.125        | 1            | 0.25         | 2              |
| TR34/L98H                     | >4           | 1            | >4           | >4           | 0.5            |
| TR <sub>46</sub> /Y121F/T289A | >16          | 0.5          | >16          | >16          | 0.25           |

Plates were incubated for 48 h at 35°C, and MIC was determined visually using an azole endpoint.

**SUPPLEMENTARY TABLE S2**

Quantitative analysis of Susceptibility of PC945 and known antifungals to *A. fumigatus* isolates determined by standard broth microdilution

| ( $\mu\text{g/mL}$ )          | PC945            |                  | Posaconazole     |                  | Voriconazole     |                  | Itraconazole     |                  | Amphotericin B   |                  |
|-------------------------------|------------------|------------------|------------------|------------------|------------------|------------------|------------------|------------------|------------------|------------------|
| <i>A. fumigatus</i> strain    | IC <sub>50</sub> | IC <sub>90</sub> | IC <sub>50</sub> | IC <sub>90</sub> | IC <sub>50</sub> | IC <sub>90</sub> | IC <sub>50</sub> | IC <sub>90</sub> | IC <sub>50</sub> | IC <sub>90</sub> |
| NCPF2010                      | 0.0084           | 0.010            | 0.0086           | 0.014            | 0.16             | 0.20             | 0.016            | 0.033            | 0.23             | 0.48             |
| TR34/L98H                     | 0.034            | >1               | 0.086            | 0.13             | >1               | >1               | 0.22             | >1               | 0.14             | 0.29             |
| TR <sub>46</sub> /Y121F/T289A | 0.67             | >1               | 0.12             | 0.72             | >1               | >1               | 0.27             | 0.77             | 0.088            | 0.38             |

Plates were incubated for 48 h at 35°C after which turbidity was assessed by measuring optical density (OD) at 530 nm using a spectrophotometer, and the IC<sub>50</sub> and IC<sub>90</sub> values were calculated from the concentration-response curve generated for each test compound.

**SUPPLEMENTARY TABLE S3**

Antifungal activities of PC945, posaconazole and voriconazole 24h post *A.fumigatus* (NCPF2010 or TR34/L98H) inoculation in bilayer alveolus model

| IC <sub>50</sub> /IC <sub>90</sub><br>(µg/mL) | Treatment in upper chamber |              |              |              | Treatment in lower chamber |              |              |              |
|-----------------------------------------------|----------------------------|--------------|--------------|--------------|----------------------------|--------------|--------------|--------------|
|                                               | PC945                      | posaconazole | voriconazole | itraconazole | PC945                      | posaconazole | voriconazole | itraconazole |
| NCPF2010                                      | 0.17/0.41                  | 0.11/0.15    | 0.61/0.91    | 0.074/0.40   | NA                         | 0.01/0.036   | 0.12/0.37    | 0.09/0.27    |
| TR34/L98H                                     | 0.41/1.45                  | 0.16/0.40    | 1.4/>3       | 0.37/2.3     | NA                         | <0.01/0.012  | 0.18/1.1     | 0.15/0.89    |

NA: not applicable (not relevant as it is expected only limited systemic exposure), ND: not done

**SUPPLEMENTARY TABLE S4**

Checkerboard analysis in broth microdilution assay in a microtiter plate for a combination of PC945 and posaconazole (top), PC945 and itraconazole (middle) and PC945 and voriconazole (bottom)

| % inhibition  |       | Posaconazole (µg/ml) |             |             |             | IR value      |       | Posaconazole (µg/ml) |             |             |             |
|---------------|-------|----------------------|-------------|-------------|-------------|---------------|-------|----------------------|-------------|-------------|-------------|
|               |       | 0                    | 0.008       | 0.016       | 0.031       |               |       | 0                    | 0.008       | 0.016       | 0.031       |
| PC945 (µg/ml) | 0     | <b>0.0</b>           | <b>9.5</b>  | <b>14.1</b> | <b>62.4</b> | PC945 (µg/ml) | 0     |                      |             |             |             |
|               | 0.008 | <b>0.0</b>           | <b>14.1</b> | <b>0.0</b>  | <b>0.0</b>  |               | 0.008 |                      | <b>1.49</b> | <b>NC</b>   | <b>NC</b>   |
|               | 0.016 | <b>67.2</b>          | <b>35.0</b> | <b>24.9</b> | <b>23.0</b> |               | 0.016 |                      | <b>0.50</b> | <b>0.35</b> | <b>0.26</b> |
|               | 0.031 | <b>88.1</b>          | <b>39.3</b> | <b>90.8</b> | <b>85.1</b> |               | 0.031 |                      | <b>0.44</b> | <b>1.01</b> | <b>0.89</b> |
|               | 0.063 | <b>79.7</b>          | <b>89.2</b> | <b>86.8</b> | <b>74.3</b> |               | 0.063 |                      | <b>1.09</b> | <b>1.05</b> | <b>0.80</b> |

| % inhibition  |       | Itraconazole (µg/ml) |             |             |             | IR value      |       | Itraconazole (µg/ml) |             |             |             |
|---------------|-------|----------------------|-------------|-------------|-------------|---------------|-------|----------------------|-------------|-------------|-------------|
|               |       | 0                    | 0.031       | 0.063       | 0.125       |               |       | 0                    | 0.031       | 0.063       | 0.125       |
| PC945 (µg/ml) | 0     | <b>0.0</b>           | <b>0.0</b>  | <b>67.8</b> | <b>74.4</b> | PC945 (µg/ml) | 0     |                      |             |             |             |
|               | 0.008 | <b>0.0</b>           | <b>0.0</b>  | <b>46.1</b> | <b>97.9</b> |               | 0.008 |                      | <b>NC</b>   | <b>0.68</b> | <b>1.32</b> |
|               | 0.016 | <b>16.9</b>          | <b>0.0</b>  | <b>61.8</b> | <b>97.1</b> |               | 0.016 |                      | <b>NC</b>   | <b>0.84</b> | <b>1.23</b> |
|               | 0.031 | <b>56.3</b>          | <b>96.9</b> | <b>97.5</b> | <b>98.6</b> |               | 0.031 |                      | <b>1.72</b> | <b>1.14</b> | <b>1.11</b> |
|               | 0.063 | <b>89.5</b>          | <b>96.3</b> | <b>97.6</b> | <b>98.0</b> |               | 0.063 |                      | <b>1.08</b> | <b>1.01</b> | <b>1.01</b> |

| % inhibition  |       | Voriconazole (µg/ml) |             |             |             |             | IR value      |       | Voriconazole (µg/ml) |             |             |             |             |
|---------------|-------|----------------------|-------------|-------------|-------------|-------------|---------------|-------|----------------------|-------------|-------------|-------------|-------------|
|               |       | 0                    | 0.063       | 0.125       | 0.25        | 0.5         |               |       | 0                    | 0.063       | 0.125       | 0.25        | 0.5         |
| PC945 (µg/ml) | 0     | <b>0.0</b>           | <b>0.0</b>  | <b>35.0</b> | <b>59.9</b> | <b>89.7</b> | PC945 (µg/ml) | 0     |                      |             |             |             |             |
|               | 0.008 | <b>0.0</b>           | <b>0.0</b>  | <b>0.0</b>  | <b>72.7</b> | <b>99.1</b> |               | 0.008 |                      | <b>NC</b>   | <b>NC</b>   | <b>1.21</b> | <b>1.10</b> |
|               | 0.016 | <b>0.0</b>           | <b>0.0</b>  | <b>92.2</b> | <b>96.9</b> | <b>97.8</b> |               | 0.016 |                      | <b>NC</b>   | <b>2.64</b> | <b>1.62</b> | <b>1.09</b> |
|               | 0.031 | <b>68.9</b>          | <b>58.3</b> | <b>84.8</b> | <b>94.8</b> | <b>98.4</b> |               | 0.031 |                      | <b>0.85</b> | <b>1.06</b> | <b>1.08</b> | <b>1.02</b> |
|               | 0.063 | <b>89.2</b>          | <b>97.2</b> | <b>95.0</b> | <b>98.3</b> | <b>97.7</b> |               | 0.063 |                      | <b>1.09</b> | <b>1.02</b> | <b>1.03</b> | <b>0.99</b> |

Inhibition % of fungal growth was calculated using OD values (OD530nm), and IR value (synergy index) was also calculated. NC: not calculable due to 0% inhibition for both compounds or in combination.

**SUPPLEMENTARY TABLE S5** Effects of combination treatment on inhibition of azole-resistant TR<sub>34</sub>/L98H *A. fumigatus* invasion.

| <u>Compartment Treated</u> |                        | Days (% Inhibition)    |                       |                        |                        |                        |           |
|----------------------------|------------------------|------------------------|-----------------------|------------------------|------------------------|------------------------|-----------|
| Upper                      | Lower                  | 1                      | 2                     | 3                      | 4                      | 5                      | 6         |
| Posaconazole (1 µg/mL)     | DMSO                   | 99.3±0.34 <sup>4</sup> | 29.5±14.1             | 1.54±1.44              | 0.1±0.00               | 0.65±0.49              | 1.30±0.78 |
| DMSO                       | Posaconazole (1 µg/mL) | 100±0.43 <sup>4</sup>  | 100±0.40 <sup>4</sup> | 100±0.40 <sup>4</sup>  | 99.9±0.52 <sup>4</sup> | 81.4±13.9 <sup>4</sup> | 0.1±0.00  |
| Posaconazole (1 µg/mL)     | Posaconazole (1 µg/mL) | 100±0.43 <sup>4</sup>  | 100±0.42 <sup>4</sup> | 100±0.48 <sup>4</sup>  | 100±0.45 <sup>4</sup>  | 98.9±1.82 <sup>4</sup> | 0.1±0.00  |
|                            | SR <sup>1</sup>        | 1.00±0.00              | 1.00±0.00             | 1.00±0.00              | 1.00±0.00              | 1.30±0.24              | 0.21±0.15 |
| Voriconazole (3 µg/mL)     | DMSO                   | 30.6±9.46              | 0.34±0.24             | 1.48±1.11              | 0.1±0.00               | 1.62±0.88              | 0.90±0.80 |
| DMSO                       | Voriconazole (3 µg/mL) | 100±0.40 <sup>4</sup>  | 100±0.44 <sup>4</sup> | 99.6±0.18 <sup>4</sup> | 11.1±3.07              | 0.62±0.26              | 1.06±0.96 |
| Voriconazole (3 µg/mL)     | Voriconazole (3 µg/mL) | 100±0.44 <sup>4</sup>  | 100±0.43 <sup>4</sup> | 100±0.47 <sup>4</sup>  | 19.5±1.22              | 15.1±4.38              | 2.61±1.26 |
|                            | SR <sup>1</sup>        | 1.00±0.00              | 1.00±0.00             | 1.00±0.00              | 2.18±0.81              | 19.8±13.6              | 12.9±6.47 |

1:Synergic Ratio (>1: Synergy), 2:p<0.05, 3:p<0.01, 4:p<0.001 vs. infection control

**SUPPLEMENTARY TABLE S6** Survival study in *A.fumigatus* (NCPF2010) infected neutropenic immunocompromised mice

**S6-1 1<sup>st</sup> in vivo study (Fig. 3)**

|                      |                                | Study survivors<br>On Day 7 | Median survival | Log-rank (Mantel Cox) test (p value)<br>(vs infection) (combination vs.single) |                                                 |
|----------------------|--------------------------------|-----------------------------|-----------------|--------------------------------------------------------------------------------|-------------------------------------------------|
| Infection control    |                                | 0/6 (0%)                    | 5 days          |                                                                                |                                                 |
| Posaconazole         | 1.0 mg/mL po                   | 0/6 (0%)                    | 6.5 days        | 0.0156                                                                         |                                                 |
| Posaconazole         | 10 mg/mL po                    | 4/6 (67%)                   | undefined       | 0.0026                                                                         |                                                 |
| PC945                | 0.4 mg/mL in                   | 0/6 (0%)                    | 6 days          | 0.093 (NS)                                                                     |                                                 |
| PC945 + posaconazole | 0.4 mg/mL in +<br>1.0 mg/mL po | 5/6 (83%)                   | undefined       | 0.0005                                                                         | 0.0036 vs, POS-1 alone<br>0.0012 vs PC945 alone |

**S6-2 2nd in vivo study**

|                      |                                | Study survivors<br>On Day 7 | Median survival | Log-rank (Mantel Cox) test (p value)<br>(vs infection) (combination vs.single) |                                              |
|----------------------|--------------------------------|-----------------------------|-----------------|--------------------------------------------------------------------------------|----------------------------------------------|
| Infection control    |                                | 0/12 (0%)                   | 5 days          |                                                                                |                                              |
| Posaconazole         | 1.0 mg/mL po                   | 2/6 (33%)                   | 7 days          | 0.0087                                                                         |                                              |
| Posaconazole         | 10 mg/mL po                    | 4/6 (67%)                   | Undefined       | 0.0011                                                                         |                                              |
| PC945                | 0.4 mg/mL in                   | 1/6 (17%)                   | 6.5 days        | 0.017                                                                          |                                              |
| PC945 + posaconazole | 0.4 mg/mL in +<br>1.0 mg/mL po | 5/6 (83%)                   | Undefined       | 0.0002                                                                         | 0.022 vs POS-1 alone<br>0.018 vs PC945 alone |

in: intranasally, PO: orally

**SUPPLEMENTARY TABLE S7**

Effects of repeated prophylactic treatment of PC945 and posaconazole on *A. fumigatus* (NCPF2010) penetration to the human alveolus.

| (DFB <sub>50</sub> : Days) | Posaconazole |             |              | PC945 |             |              |
|----------------------------|--------------|-------------|--------------|-------|-------------|--------------|
|                            | -24h         | -96 to -24h | -168 to -24h | -24h  | -96 to -24h | -168 to -24h |
| pre-treatment              |              |             |              |       |             |              |
| 0.3µg/mL                   | 1.2          | 1.9         | 1.3          | <1    | 2.0         | 3.0          |
| 1µg/mL                     | 2.4          | 2.6         | 3.1          | 2.5   | 6.8         | 6.4          |

Compounds were treated 24h before infection, 96, 72, 48, 24h repeatedly before infection or 168, 144, 120, 96, 72, 48, 24h repeatedly before infection. DFB50 (Days until fungal burden reaches 50% of control) was calculated in each treatment arm.
